# Supplementary material
Source: PubMed Central journal article supplement (PMC6894064)
Supplement: fj.201901353R.sd1.pdf [file fj.201901353R.sd1.pdf]

1  
2  
3  
4  
5  
6  
7  
8  
9  
10  
11  
12  
13  
14  
15  
16  
17  
18  
19  
20  
21  
22

**Placental growth factor negatively regulates endothelial cell barrier function through suppression of glucose-6-phosphate dehydrogenase and anti-oxidant defense systems**

Hu Huang<sup>1\*</sup>, Anton Lennikov<sup>1</sup>, Madhu Saddala<sup>1</sup>, David Gozal<sup>2</sup>, Dennis J. Grab<sup>3,4</sup>, Abdelnaby Khalyfa<sup>2</sup>, Lijuan Fan<sup>1</sup>

- 1. University of Missouri-Columbia, Department of Ophthalmology, Missouri, MO, USA
- 2. University of Missouri-Columbia, Children Health Research Institute, Missouri, MO, USA
- 3. Johns Hopkins University, Department of Pathology, Baltimore, MD, USA
- 4. Uniformed Services University of the Health Sciences, Bethesda, MD, USA

\*Corresponding author:

Hu Huang, PhD

University of Missouri-Columbia

1 Hospital Drive

Columbia, MO 65212

Phone: 573-882-9899

huangh1@missouri.edu

23 **Supplementary Figures**

24 **Supplementary Figure 1: PlGF neutralization prevents bovine retinal endothelial cell (BREC)**  
25 **barrier dysfunction by high glucose.** (A) The TEER of BREC under conditions of high glucose:  
26 (HG: 25mM D-glucose + IgG control) (red), 25mM L-glucose + IgG control (gray), and 25mM  
27 D-glucose +  $\alpha$ PlGF antibody (green). Note that TEER began dropping from HG at about 5 days  
28 (95 h). \*\*\* denotes  $p < 0.001$ ; n.s. stands for no significance ( $p > 0.05$ ). (B) The protein levels of  
29 ZO-1, Occludin-1, and Claudin-5 of BREC under normal glucose control, HG + Igg and HG +  
30 PlGF antibody. (C) Immunofluorescence staining results of ZO-1: Note that HG reduced ZO-1  
31 protein disintegration in the plasma membrane, which however was prevented by PlGF antibody  
32 treatment.

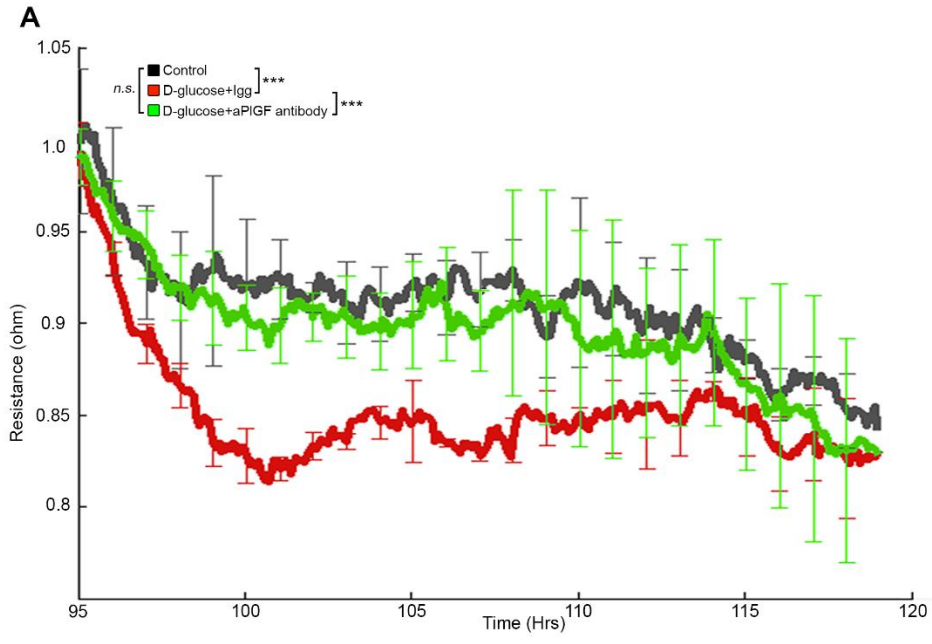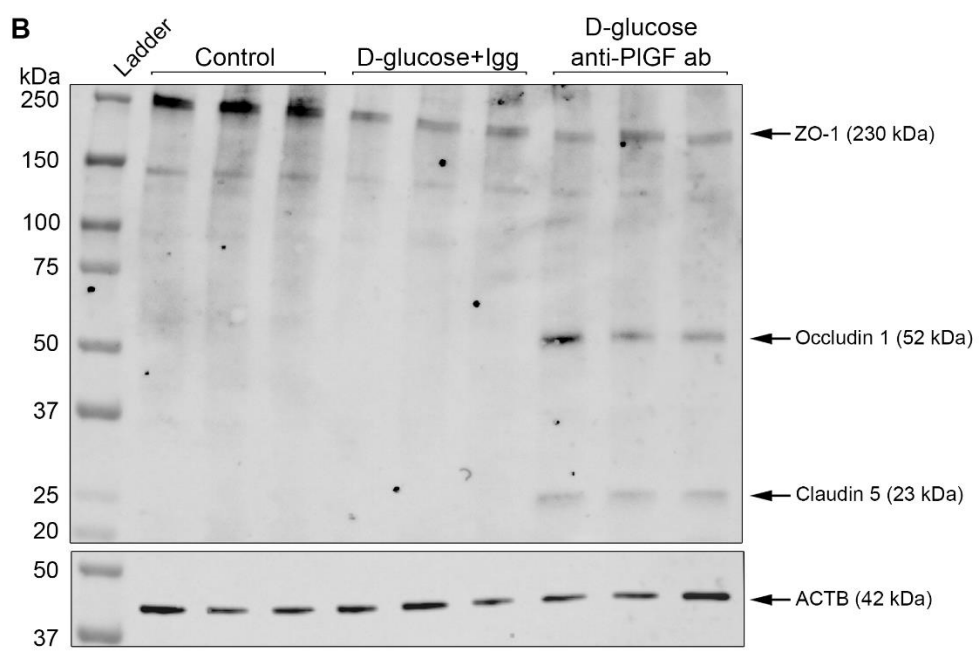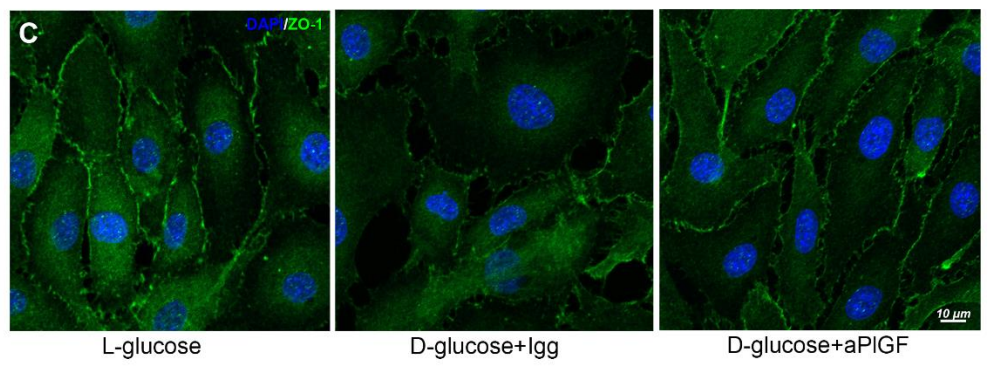

34 **Supplementary Figure 2. The minimal cytotoxic effect of DHEA on the cells.** Confluent human  
 35 and bovine retinal endothelial cell (HREC and BREC) were treated with PBS DMSO control,  
 36 DHEA (25  $\mu$ M), and Triton X-100. Cytotoxic assay was performed as described in methods. (A)  
 37 The results of fluorescent probe-based cell viability assay. Blue fluorescent staining by live reagent  
 38 showed the live cell numbers. Green fluorescent staining by dead reagent indicates dead cells. (B  
 39 and C) The cell viability demonstrated by LDH activity in the cell culture media. The results were  
 40 expressed as the mean cell viability percentage relative to controls. The experiments were repeated  
 41 three times.

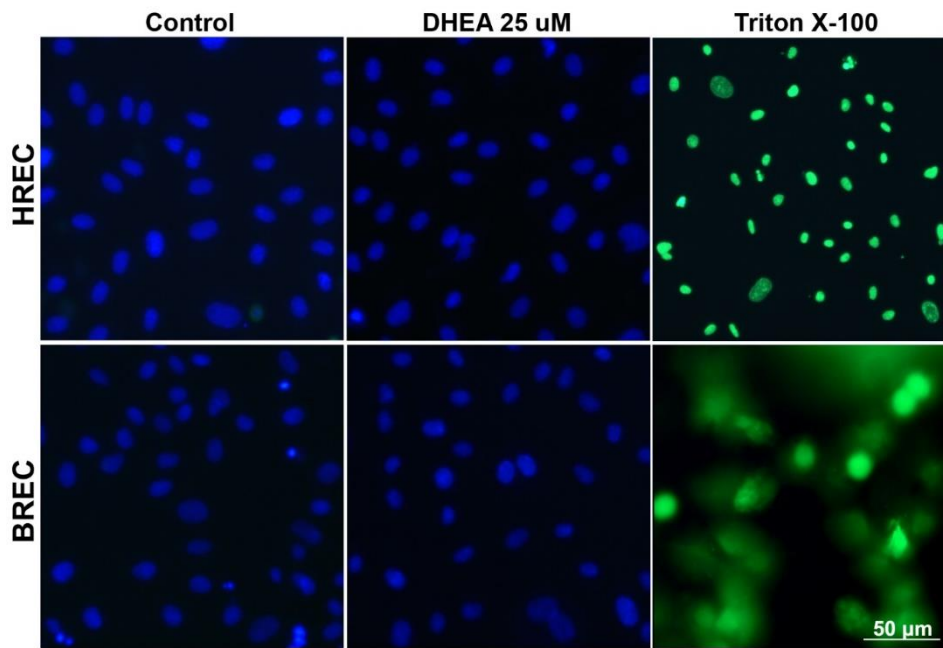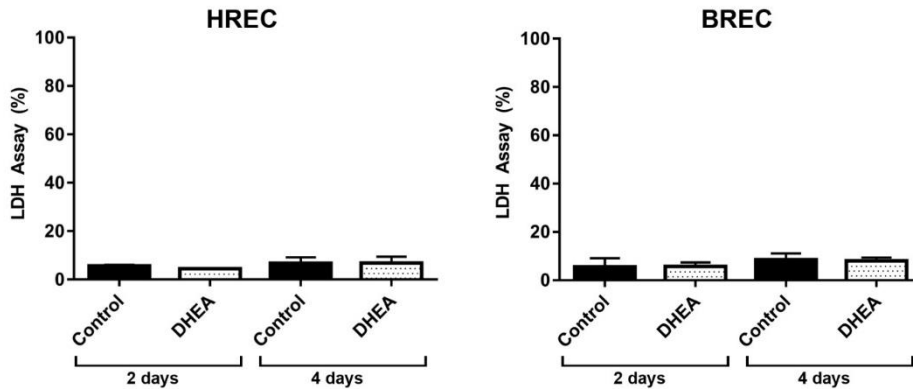

42

43

44 **Supplementary Figure 3. G6PD inhibition (DHEA) diminishes elevated Prdx6 protein**  
 45 **expression and G6PD activity in bovine retinal endothelial cells (BRECs).** (A) Western  
 46 blotting results of Prdx6: DHEA diminished the elevated level of PRDX6 protein expression (both  
 47 monomer and dimer) due to PlGF antibody in BREC. (B) G6PD enzyme activity: DHEA  
 48 diminished the elevated PRDX6 enzyme activity due to PGF antibody (25  $\mu$ g/ml) in BREC. (C)  
 49 Immunofluorescence staining of Prdx6: DHEA diminished the elevated Prdx6 protein expression  
 50 through PGF inhibition in BREC.

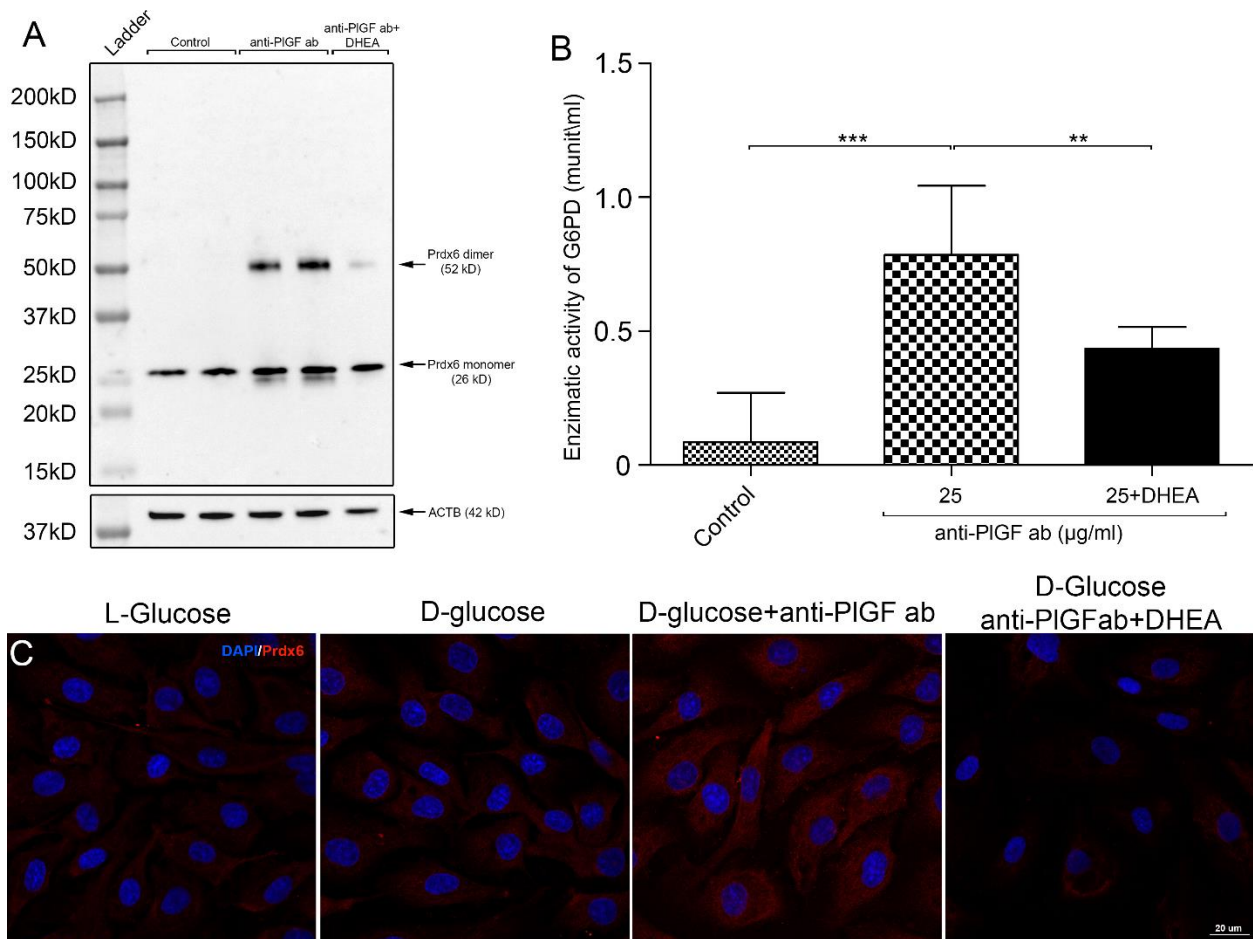

51

52

53

54 **Supplementary Figure 4. G6PD siRNA reduces HREC resistance and down-regulates**  
 55 **barrier function protein expression levels.** After HREC grew to about 80-90% confluence,  
 56 transfection of control siRNA and G6PD siRNA was performed with lipofectamine. About 18 h  
 57 after transfection, culture media were replaced with fresh media. Anti-PlGF antibody (100 $\mu$ g/ml)  
 58 was supplemented to boost EC barrier function and junction formation. (A) HREC TEER was  
 59 monitored with ECIS system in real time. Normalized resistances of control siRNA (red) and  
 60 G6PD siRNA (green) are shown. N=4 for each condition. (B) G6PD siRNA effectively down-  
 61 regulated the protein levels of G6PD, tight junction and adhesion proteins (VE-Cadherin,  $\beta$ -catenin,  
 62 ZO-1, Claudin-5, Occludin-1), as well as PRDX6.  $\beta$ -Actin was used as protein loading control.

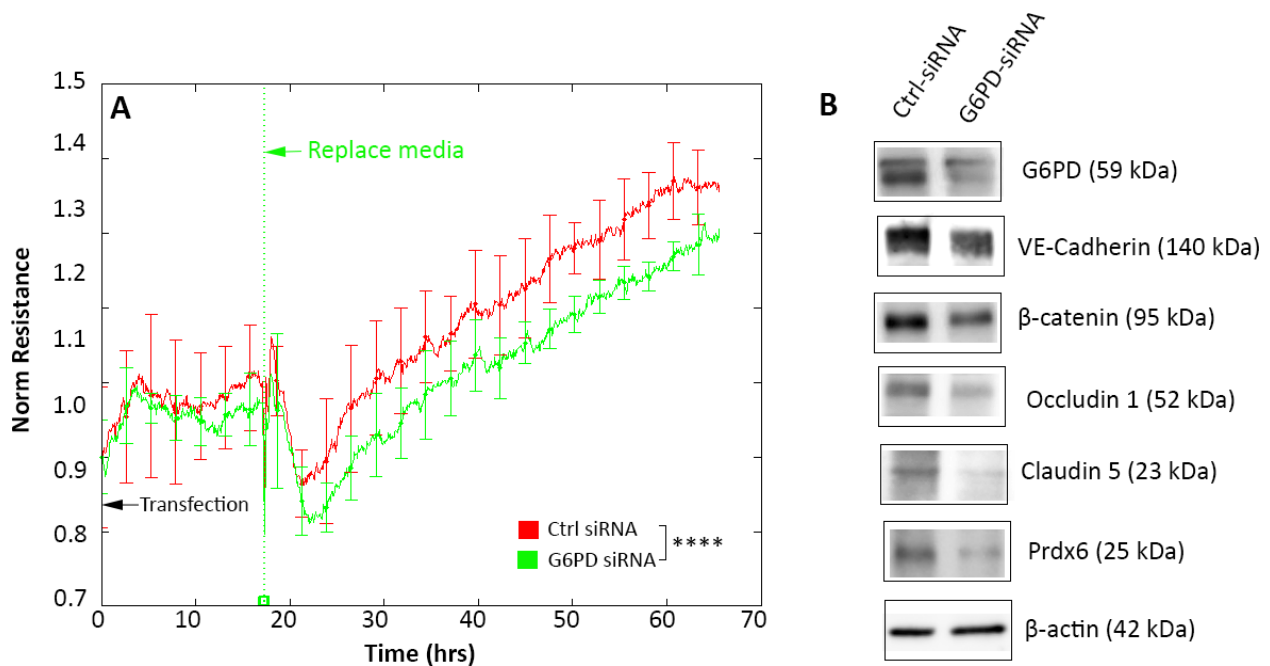

63  
 64  
 65  
 66  
 67

68 **Supplementary Figure 5. Recombinant human (rh) PlGF down-regulates G6PD and PRDX6**  
69 **in human retinal endothelial cells (HRECs).** Confluent HRECs were treated with PBS control  
70 or rhPlGF protein for 48 h. (A) Double immunofluorescence staining of G6PD and PRDX6 in the  
71 PBS control condition: Note co-localization of the two proteins in cytoplasm (yellow). (B & C)  
72 Double immunostaining of G6PD and PRDX6 in the rhVEGF (B) and rhPlGF (C) treatment  
73 condition: Note the reduced staining signal in rhPlGF compared to PBS control and rhVEGF.

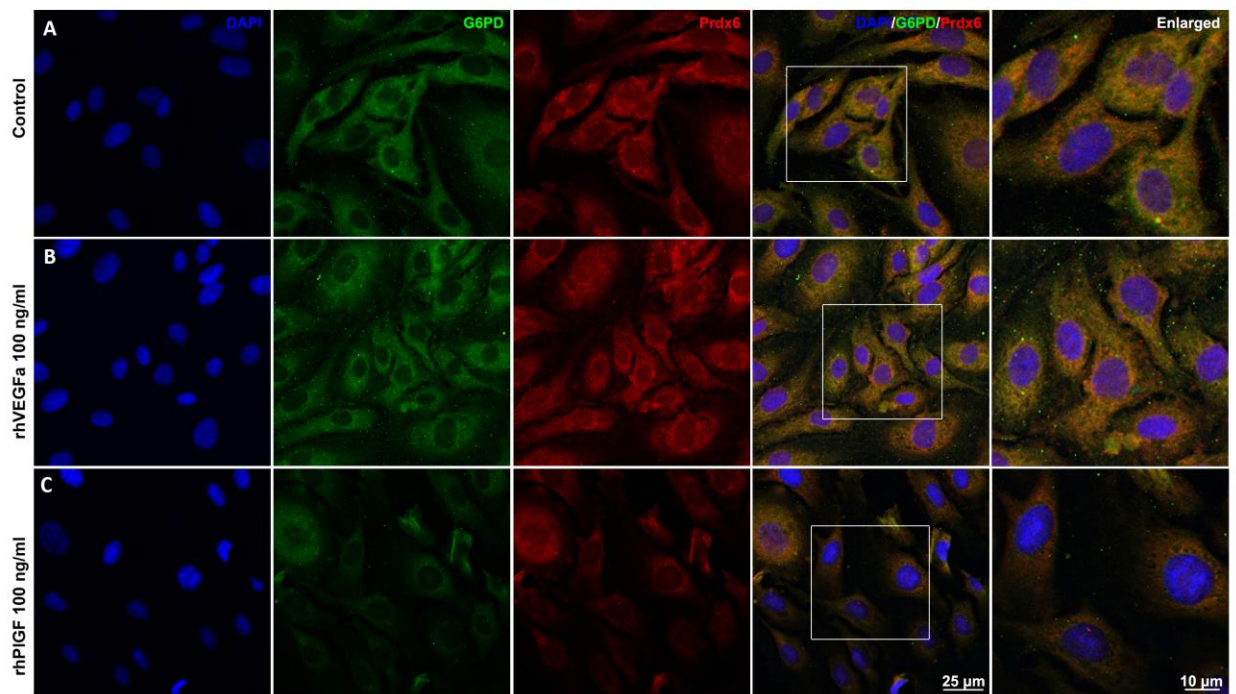

74
